# Supplementary material
Source: PubMed Central journal article supplement (PMC8187332)
Supplement: NIHMS1702627-supplement-Supplemental_Material.pdf [file NIHMS1702627-supplement-Supplemental_Material.pdf]

**ESM Table 1: Maternal food consumption in late pregnancy by offspring endpoint in the TEDDY study (N=8556)**

| Maternal Food Consumption (tertile cutpoints) | IA  |           | Non-IA |           | T1D |           | Non-T1D |           |
|-----------------------------------------------|-----|-----------|--------|-----------|-----|-----------|---------|-----------|
|                                               | n   | Mean (SD) | n      | Mean (SD) | n   | Mean (SD) | n       | Mean (SD) |
| Gluten Foods (168, 247 g/day)                 | 782 | 221 (108) | 7617   | 220 (116) | 328 | 215 (94)  | 8071    | 220 (116) |
| Non-Gluten Cereals (30, 64 g/day)             | 782 | 57 (57)   | 7617   | 61 (73)   | 328 | 55 (49)   | 8071    | 61 (71)   |
| Fresh Milk (227, 515 g/day)                   | 782 | 403 (300) | 7615   | 416 (339) | 328 | 415 (330) | 8069    | 415 (335) |
| Sour Milk (53, 170 g/day)                     | 782 | 148 (152) | 7613   | 133 (146) | 328 | 144 (152) | 8067    | 135 (146) |
| Cheese Products (30, 60 g/day)                | 781 | 53 (47)   | 7612   | 53 (51)   | 327 | 50 (43)   | 8066    | 53 (51)   |
| Lean or Medium fat Fish (4, 14 g/day)         | 781 | 13 (24)   | 7614   | 14 (25)   | 328 | 14 (31)   | 8067    | 14 (25)   |
| Fatty Fish (5, 18 g/day)                      | 781 | 16 (22)   | 7616   | 17 (27)   | 328 | 15 (19)   | 8069    | 17 (27)   |

**ESM Table 2: Hazard ratios from stratified Cox proportional hazards model (strata=country) for gluten-containing foods.**

|                                                  | Any Persistent Antibody (IA) |         | IAA-first IA      |         | GADA-first IA     |         | T1D               |                |
|--------------------------------------------------|------------------------------|---------|-------------------|---------|-------------------|---------|-------------------|----------------|
|                                                  | HR (95% CI)                  | p-value | HR (95% CI)       | p-value | HR (95% CI)       | p-value | HR (95% CI)       | p-value        |
| <b>HLA (Ref=HLA-DR3/4)</b>                       |                              | <0.001  |                   | <0.001  |                   | <0.001  |                   | <0.001         |
| <i>HLA-DR4/4</i>                                 | 0.73 (0.60, 0.88)            |         | 0.77 (0.56, 1.06) |         | 0.57 (0.42, 0.78) |         | 0.66 (0.49, 0.88) |                |
| <i>HLA-DR4/8</i>                                 | 0.73 (0.59, 0.89)            |         | 0.96 (0.71, 1.31) |         | 0.58 (0.41, 0.82) |         | 0.57 (0.41, 0.80) |                |
| <i>HLA-DR3/3</i>                                 | 0.52 (0.42, 0.64)            |         | 0.36 (0.24, 0.55) |         | 0.78 (0.59, 1.02) |         | 0.29 (0.19, 0.43) |                |
| All Others                                       | 0.39 (0.26, 0.59)            |         | 0.50 (0.27, 0.93) |         | 0.13 (0.05, 0.37) |         | 0.37 (0.22, 0.64) |                |
| <b>Gender (Ref=Female)</b>                       | 1.19 (1.03, 1.37)            | 0.017   | 1.30 (1.03, 1.64) | 0.027   | 1.07 (0.87, 1.33) | 0.526   | 1.06 (0.86, 1.32) | 0.585          |
| <b>First Degree Relative (Ref=No)</b>            | 2.33 (1.91, 2.83)            | <0.001  | 2.54 (1.84, 3.50) | <0.001  | 2.36 (1.76, 3.17) | <0.001  | 3.40 (2.59, 4.48) | <0.001         |
| <b>Probiotics Before 4 weeks (Ref=No)</b>        | 0.81 (0.62, 1.04)            | 0.093   | 0.75 (0.51, 1.12) | 0.165   | 0.81 (0.54, 1.22) | 0.311   | . <sup>1</sup>    | . <sup>1</sup> |
| <b>Gluten-Containing Foods Tertile (Ref=Low)</b> |                              | 0.990   |                   | 0.512   |                   | 0.351   |                   | .667           |
| Medium                                           | 0.99 (0.83, 1.18)            |         | 0.85 (0.63, 1.13) |         | 1.21 (0.93, 1.59) |         | 0.96 (0.73, 1.25) |                |
| High                                             | 1.00 (0.83, 1.20)            |         | 0.95 (0.71, 1.26) |         | 1.08 (0.82, 1.43) |         | 0.88 (0.67, 1.17) |                |

<sup>1</sup>Probiotics Before 4 weeks not included as covariate for T1D

HR = hazard ratio

CI = confidence interval

## **The TEDDY Study Group**

**Colorado Clinical Center:** Marian Rewers, M.D., Ph.D., PI<sup>1,4,6,9,10</sup>, Aaron Barbour, Kimberly Bautista<sup>11</sup>, Judith Baxter<sup>8,9,11</sup>, Daniel Felipe-Morales, Kimberly Driscoll, Ph.D.<sup>8</sup>, Brigitte I. Frohnert, M.D.<sup>2,13</sup>, Marisa Stahl, M.D.<sup>12</sup>, Patricia Gesualdo<sup>2,6,11,13</sup>, Michelle Hoffman<sup>11,12,13</sup>, Rachel Karban<sup>11</sup>, Edwin Liu, M.D.<sup>12</sup>, Jill Norris, Ph.D.<sup>2,3,11</sup>, Stesha Peacock, Hanan Shorrosh, Andrea Steck, M.D.<sup>3,13</sup>, Megan Stern, Erica Villegas<sup>2</sup>, Kathleen Waugh<sup>6,7,11</sup>. University of Colorado, Anschutz Medical Campus, Barbara Davis Center for Childhood Diabetes.

**Finland Clinical Center:** Jorma Toppari, M.D., Ph.D., PI<sup>¥1,4,10,13</sup>, Olli G. Simell, M.D., Ph.D., Annika Adamsson, Ph.D.<sup>^11</sup>, Sanna-Mari Aaltonen<sup>^</sup>, Suvi Ahonen<sup>\*±§</sup>, Mari Åkerlund<sup>\*±§</sup>, Leena Hakola<sup>\*±</sup>, Anne Hekkala, M.D.<sup>μ±</sup>, Henna Holappa<sup>μ±</sup>, Heikki Hyöty, M.D., Ph.D.<sup>\*±6</sup>, Anni Ikonen<sup>μ±</sup>, Jorma Ilonen, M.D., Ph.D.<sup>¥¶3</sup>, Sinikka Jäminki<sup>\*±</sup>, Sanna Jokipuu<sup>^</sup>, Leena Karlsson<sup>^</sup>, Jukka Kero M.D., Ph.D.<sup>¥^3, 13</sup>, Miia Kähönen<sup>μ±11,13</sup>, Mikael Knip, M.D., Ph.D.<sup>\*±</sup>, Minna-Liisa Koivikko<sup>μ±</sup>, Merja Koskinen<sup>\*±</sup>, Mirva Koreasalo<sup>\*±§2</sup>, Kalle Kurppa, M.D., Ph.D.<sup>\*±12</sup>, Jarita Kytölä<sup>\*±</sup>, Jutta Laiho, Ph.D.<sup>\*6</sup>, Tiina Latva-aho<sup>μ±</sup>, Laura Leppänen<sup>^</sup>, Katri Lindfors, Ph.D.<sup>\*12</sup>, Maria Lönnrot, M.D., Ph.D.<sup>\*±6</sup>, Elina Mäntymäki<sup>^</sup>, Markus Mattila<sup>\*±</sup>, Maija Miettinen<sup>§2</sup>, Katja Multasuo<sup>μ±</sup>, Teija Mykkänen<sup>μ±</sup>, Tiina Niininen<sup>±\*11</sup>, Sari Niinistö<sup>§2</sup>, Mia Nyblom<sup>\*±</sup>, Sami Oikarinen, Ph.D.<sup>\*±6</sup>, Paula Ollikainen<sup>μ±</sup>, Zhian Othmani<sup>¥</sup>, Sirpa Pohjola<sup>μ±</sup>, Jenna Rautanen<sup>±§</sup>, Anne Riikonen<sup>\*±§2</sup>, Miia Pekkola<sup>\*±</sup>, Minna Romo<sup>^</sup>, Satu Simell, M.D., Ph.D.<sup>¥12</sup>, Aino Stenius<sup>μ±11</sup>, Päivi Tossavainen, M.D.<sup>μ±</sup>, Mari Vähä-Mäkilä<sup>¥</sup>, Eeva Varjonen<sup>^11</sup>, Riitta Veijola, M.D., Ph.D.<sup>μ±13</sup>, Irene Viinikangas<sup>μ±</sup>, Suvi M. Virtanen, M.D., Ph.D.<sup>\*±§2</sup>. ¥University of Turku, \*Tampere University, ^University of Oulu, ^Turku University Hospital, Hospital District of Southwest Finland, ±Tampere University Hospital, ±Oulu University Hospital, §Finnish Institute for Health and Welfare, Finland, ¶University of Kuopio.

**Georgia/Florida Clinical Center:** Jin-Xiong She, Ph.D., PI<sup>1,3,4,10</sup>, Desmond Schatz, M.D.<sup>\*4,7,8</sup>, Diane Hopkins<sup>11</sup>, Leigh Steed<sup>11,12,13</sup>, Jennifer Bryant<sup>11</sup>, Katherine Silvis<sup>2</sup>, Michael Haller, M.D.<sup>\*13</sup>, Melissa Gardiner<sup>11</sup>, Richard McIndoe, Ph.D., Ashok Sharma, Stephen W. Anderson, M.D.<sup>^</sup>, Laura Jacobsen, M.D.<sup>\*13</sup>, John Marks, DHSc.<sup>\*11,13</sup>, P.D. Towe\*. Center for Biotechnology and Genomic Medicine, Augusta University. \*University of Florida, Pediatric Endocrinology. ^Pediatric Endocrine Associates, Atlanta.

**Germany Clinical Center:** Anette G. Ziegler, M.D., PI<sup>1,3,4,10</sup>, Ezio Bonifacio Ph.D.<sup>\*</sup>, Cigdem Gezginci, Anja Heublein, Eva Hohoff<sup>¥2</sup>, Sandra Hummel, Ph.D.<sup>2</sup>, Annette Knopff<sup>7</sup>, Charlotte Koch, Sibylle Koletzko, M.D.<sup>¶12</sup>, Claudia Ramminger<sup>11</sup>, Roswith Roth, Ph.D.<sup>8</sup>, Jennifer Schmidt, Marlon Scholz, Joanna Stock<sup>8,11,13</sup>, Katharina Warncke, M.D.<sup>13</sup>, Lorena Wendel, Christiane Winkler, Ph.D.<sup>2,11</sup>. Forschergruppe Diabetes e.V. and Institute of Diabetes Research, Helmholtz Zentrum München, Forschergruppe Diabetes, and Klinikum rechts der Isar, Technische Universität München. \*Center for Regenerative Therapies, TU Dresden, ¶Dr. von Hauner Children's Hospital, Department of Gastroenterology, Ludwig Maximilians University Munich, ¥University of Bonn, Department of Nutritional Epidemiology.

**Sweden Clinical Center:** Åke Lernmark, Ph.D., PI<sup>1,3,4,5,6,8,9,10</sup>, Daniel Agardh, M.D., Ph.D.<sup>6,12</sup>, Carin Andrén Aronsson, Ph.D.<sup>2,11,12</sup>, Maria Ask, Rasmus Bennet, Corrado Cilio, Ph.D., M.D.<sup>6</sup>, Susanne Dahlberg, Emelie Ericson-Hallström, Annika Björne Fors, Lina Fransson, Thomas Gard, Monika Hansen, Susanne Hyberg, Fredrik Johansen, Berglind Jonsdottir, M.D., Ph.D.<sup>11</sup>, Helena Elding Larsson, M.D., Ph.D.<sup>6,13</sup>, Marielle Lindström, Markus Lundgren, M.D., Ph.D.<sup>13</sup>, Marlena Maziarz, Ph.D., Maria Månsson Martinez, Jessica Melin<sup>11</sup>, Zeliha Mestan, Caroline Nilsson, Kobra Rahmati, Anita Ramelius, Falastin Salami, Anette Sjöberg, Birgitta Sjöberg, Carina Törn, Ph.D.<sup>3</sup>, Ulrika Ulvenhag, Terese Wiktorsson, Åsa Wimar<sup>13</sup>. Lund University.

**Washington Clinical Center:** William A. Hagopian, M.D., Ph.D., PI<sup>1,3,4,6,7,10,12,13</sup>, Michael Killian<sup>6,7,11,12</sup>, Claire Cowen Crouch<sup>11,13</sup>, Jennifer Skidmore<sup>2</sup>, Christian Chamberlain, Brelon Fairman, Arlene Meyer, Jocelyn Meyer, Denise Mulenga<sup>11</sup>, Nole Powell, Jared Radtke, Shreya Roy, Davey Schmitt, Sarah Zink. Pacific Northwest Research Institute.

**Pennsylvania Satellite Center:** Dorothy Becker, M.D., Margaret Franciscus, MaryEllen Dalmagro-Elias Smith<sup>2</sup>, Ashi Daftary, M.D., Mary Beth Klein, Chrystal Yates. Children's Hospital of Pittsburgh of UPMC.

**Data Coordinating Center:** Jeffrey P. Krischer, Ph.D., PI<sup>1,4,5,9,10</sup>, Rajesh Adusumali, Sarah Austin-Gonzalez, Maryouri Avendano, Sandra Baethke, Brant Burkhardt, Ph.D.<sup>6</sup>, Martha Butterworth<sup>2</sup>, Nicholas Cadigan, Joanna Clasen, Kevin Counts, Christopher Eberhard, Steven Fiske<sup>8</sup>, Laura Gandolfo, Jennifer Garmeson, Veena Gowda, Belinda Hsiao, Christina Karges, Qian Li, Ph.D.<sup>2,3</sup>, Shu Liu, Xiang Liu, Ph.D.<sup>2,3,8,13</sup>, Kristian Lynch, Ph.D.<sup>6,8</sup>, Jamie Malloy, Cristina McCarthy<sup>11</sup>, Jose Moreno, Hemang Parikh, Ph.D.<sup>3</sup>, Cassandra Remedios, Chris Shaffer, Susan Smith<sup>11</sup>, Noah Sulman, Ph.D., Roy Tamura, Ph.D.<sup>1,2,11,12,13</sup>, Dena Tewey, Michael Toth, Ulla Uusitalo, Ph.D.<sup>2</sup>, Kendra Vehik, Ph.D.<sup>4,5,6,8,13</sup>, Ponni Vijayakandipan, Melissa Wroble, Jimin Yang, Ph.D., R.D.<sup>2</sup>, Kenneth Young, Ph.D. *Past staff: Michael Abbondandolo, Lori Ballard, Rasheedah Brown, David Cuthbertson, Stephen Dankyi, David Hadley, Ph.D., Kathleen Heyman, Francisco Perez Laras, Hye-Seung Lee, Ph.D., Colleen Maguire, Wendy McLeod, Aubrie Merrell, Steven Meulemans, Ryan Quigley, Laura Smith, Ph.D.<sup>8,11</sup>.* University of South Florida.

**Project scientist:** Beena Akolkar, Ph.D.<sup>1,3,4,5,6,7,9,10</sup>. National Institutes of Diabetes and Digestive and Kidney Diseases.

**Autoantibody Reference Laboratories:** Liping Yu, M.D.<sup>^5</sup>, Dongmei Miao, M.D.<sup>^</sup>, Polly Bingley, M.D., FRCP<sup>\*5</sup>, Alistair Williams<sup>\*</sup>, Kyla Chandler<sup>\*</sup>, Ilana Kelland<sup>\*</sup>, Yassin Ben Khoud<sup>\*</sup>, Huma Zahid<sup>\*</sup>, Matthew Randell <sup>\*</sup>. <sup>^</sup>Barbara Davis Center for Childhood Diabetes, University of Colorado Denver, <sup>\*</sup>Bristol Medical School, University of Bristol, UK.

**SNP Laboratory:** Stephen S. Rich, Ph.D.<sup>3</sup>, Wei-Min Chen, Ph.D.<sup>3</sup>, Suna Onengut-Gumuscu, Ph.D.<sup>3</sup>, Emily Farber, Rebecca Roche Pickin, Ph.D., Jonathan Davis, Jordan Davis, Dan Gallo, Jessica Bonnie, Paul Campolieto. Center for Public Health Genomics, University of Virginia.

**Repository:** Sandra Ke, Niveen Mulholland, Ph.D. NIDDK Biosample Repository at Fisher BioServices.

**Other contributors:** Thomas Briese, Ph.D.<sup>6</sup>, Columbia University. Todd Brusko, Ph.D.<sup>5</sup>, University of Florida. Suzanne Bennett Johnson, Ph.D.<sup>8,11</sup>, Florida State University. Eoin McKinney, Ph.D.<sup>5</sup>, University of Cambridge. Tomi Pastinen, M.D., Ph.D.<sup>5</sup>, The Children's Mercy Hospital. Eric Triplett, Ph.D.<sup>6</sup>, University of Florida.

**Committees:**

<sup>1</sup>Ancillary Studies, <sup>2</sup>Diet, <sup>3</sup>Genetics, <sup>4</sup>Human Subjects/Publicity/Publications, <sup>5</sup>Immune Markers, <sup>6</sup>Infectious Agents, <sup>7</sup>Laboratory Implementation, <sup>8</sup>Psychosocial, <sup>9</sup>Quality Assurance, <sup>10</sup>Steering, <sup>11</sup>Study Coordinators, <sup>12</sup>Celiac Disease, <sup>13</sup>Clinical Implementation.
